# Supplementary material for: Preclinical evaluation of potential therapeutic targets in dedifferentiated liposarcoma
Source: PubMed Central journal article supplement (PMC5342366; doi:10.18632/oncotarget.10518), 2016-07-09
Supplement: oncotarget-07-54583-s001.pdf [file oncotarget-07-54583-s001.pdf]

# Preclinical evaluation of potential therapeutic targets in dedifferentiated liposarcoma

## Supplementary Materials

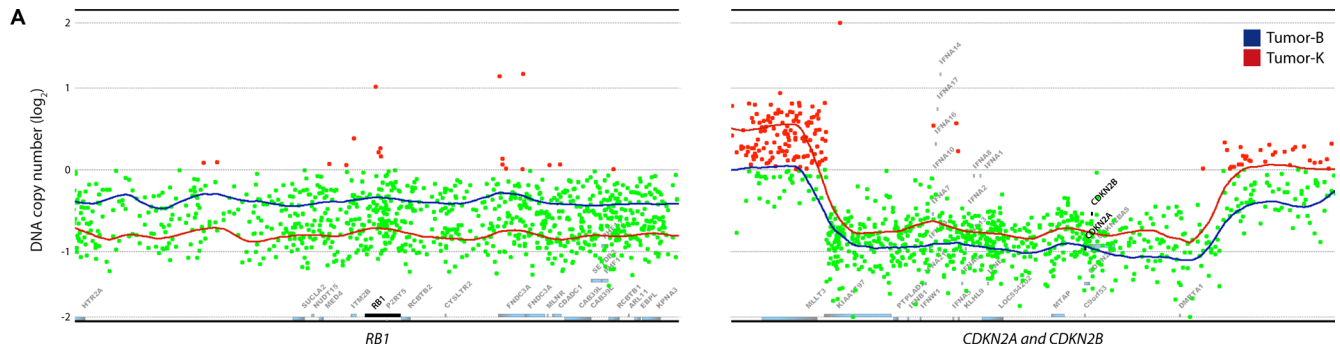

**Supplementary Figure S1: DNA copy number changes for tumor-B (blue) and -K (red).** (A) Detailed view on the genomic region for *RB1*, *CDKN2A* and *CDKN2B*; red dots with a log<sub>2</sub> ratio > 0 and green dots with log<sub>2</sub> ratio < 0. The log<sub>2</sub> ratio is plotted according to position with triangular smoothing of 200 kb.

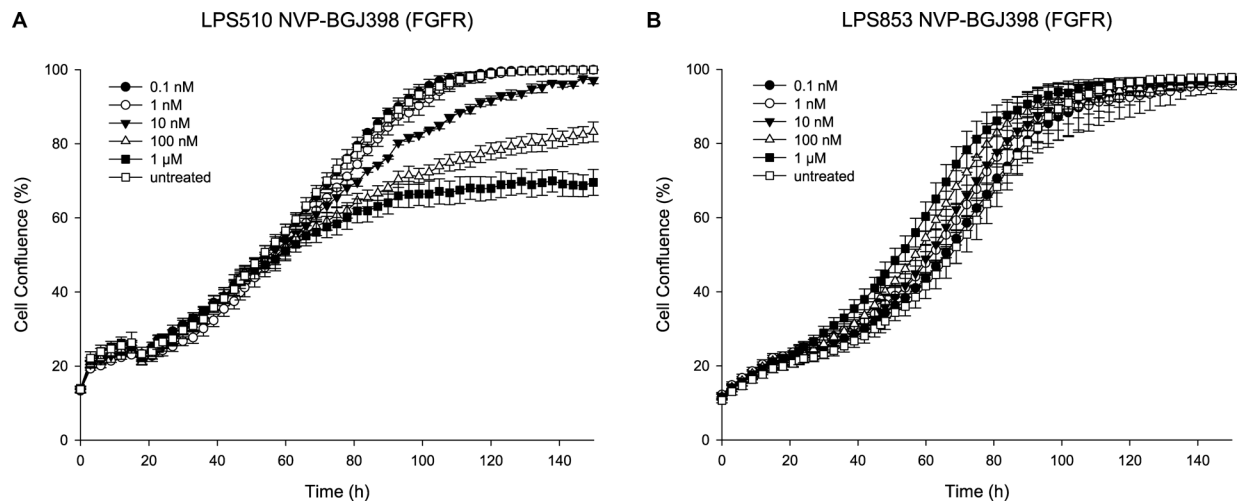

**Supplementary Figure S2: The response of two additional DDLPS cell lines to FGFR inhibition with NVP-BGJ398.** (A) Proliferation of LPS510 cells after inhibition of FGFR with NVP-BGJ398; ( $n = 1$ ). (B) Proliferation of LPS853 cells after inhibition of FGFR with NVP-BGJ398; ( $n = 1$ ). (A–B) Proliferation measured based on confluence over time; error bars represent standard error (SE) of the measurements. Untreated with DMSO concentration corresponding to that of the highest drug concentration.

**Supplementary Table S1: Single nucleotide variations (SNVs) in tumor B, D and K.** See Supplementary Table\_S1

**Supplementary Table S2: Shared mutations (missense, silent and splice site) between tumor B, D and K**

| Gene Symbol | Chromosome | Start position | Reference Allele | Mutated Allele | Variant Classification | Mutant Expression |
|-------------|------------|----------------|------------------|----------------|------------------------|-------------------|
| FAM131C     | 1          | 16385007       | C                | T              | Silent                 | No                |
| DOCK7       | 1          | 63099204       | G                | A              | Missense Mutation      | Yes               |
| TSN         | 2          | 122522834      | A                | G              | Missense Mutation      | Yes               |
| CYTIP       | 2          | 158300390      | G                | A              | Missense Mutation      | No                |
| EDEM1       | 3          | 5255002        | A                | G              | Splice Site            | Yes               |
| MUC12       | 7          | 100638279      | T                | C              | Missense Mutation      | No                |
| MGAM        | 7          | 141727465      | G                | A              | Missense Mutation      | No                |
| AQP7        | 9          | 33395108       | G                | A              | Silent                 | No                |
| SVIL        | 10         | 29762864       | C                | T              | Missense Mutation      | Yes               |
| NDUFA9      | 12         | 4778952        | G                | A              | Missense Mutation      | Yes               |
| DDX11       | 12         | 31242911       | C                | T              | Silent                 | Yes               |
| COL2A1      | 12         | 48372514       | C                | T              | Missense Mutation      | No                |
| PPFIA2      | 12         | 81693145       | C                | T              | Missense Mutation      | No                |
| LTA4H       | 12         | 96412657       | C                | T              | Missense Mutation      | No                |
| LTA4H       | 12         | 96412678       | C                | T              | Missense Mutation      | No                |
| WDR66       | 12         | 122439498      | G                | A              | Missense Mutation      | No                |
| TPP2        | 13         | 103301494      | G                | C              | Missense Mutation      | Yes               |
| KCNK10      | 14         | 88658663       | A                | G              | Missense Mutation      | No                |
| DNAAF1      | 16         | 84182654       | C                | T              | Missense Mutation      | No                |
| COG1        | 17         | 71193530       | C                | G              | Missense Mutation      | Yes               |
| ASB9        | X          | 15268665       | G                | A              | Missense Mutation      | No                |
| MCTS1       | X          | 119740017      | G                | C              | Missense Mutation      | No                |

**Supplementary Table S3: DNA copy number differences between tumor B and K.** See Supplementary Table\_S3

**Supplementary Table S4: DNA copy number and gene expression between tumor B, NRH-LS1 and iMSC#3.** See Supplementary Table\_S4
